# Supplementary material
Source: PubMed Central journal article supplement (PMC280682)
Supplement: 1471-2334-3-26-S2.pdf [file 1471-2334-3-26-S2.pdf]

Table 2: 5'-16S rDNA and ITS RIDOM or GenBank similarity search best matches with non-valid named mycobacterial GenBank entries or newly determined sequences from non-valid named culture collection strains

| Species                                | Culture collection or [GenBank Accession]  | Result                                                                                                                                                                                              | rDNA |
|----------------------------------------|--------------------------------------------|-----------------------------------------------------------------------------------------------------------------------------------------------------------------------------------------------------|------|
| "M. acapulcensis"                      | ATCC 14473 / 1961 <sup>a</sup>             | 97% similarity search match with RIDOM entry <i>M. thermoresistibile</i> DSM 44167 (T); <b>most probably</b> a new species                                                                          | 16S  |
| "M. album" <sup>b</sup>                | DSM 43970 / 1987                           | 100% similarity search match with GenBank sequences from <i>Rhodococcus chubuensis</i> [X80627] and <i>Gordonia sputi</i> [X81927]; most probably <b>not</b> a mycobacterial species                | 16S  |
| "M. anthracenicum"                     | [Y15709] / 1997 <sup>c</sup>               | 99.5% similarity search match with RIDOM entry <i>M. porcinum</i> DSM 44242 (T); probably <b>not</b> a new species                                                                                  | 16S  |
| "M. borstelense" subsp. "niacinogenes" | DSM 43489 (ATCC 19540) <sup>d</sup> / 1965 | 100% similarity search match with RIDOM entry <i>M. chelonae</i> DSM 43804 (T); most probably <b>not</b> a new species                                                                              | 16S  |
| "M. buckleii"                          | [AF000225] / 1997                          | 100 % similarity search match with RIDOM entry <i>M. hassiacum</i> DSM 44199 (T); most probably <b>not</b> a new species                                                                            | 16S  |
| "M. canettii"                          | [AJ007315] / 1998                          | 99.7% similarity search match with GenBank entry <i>M. tuberculosis</i> [AJ131120]; "M. canettii" is recognized as a smooth variant of <i>M. tuberculosis</i>                                       | 16S  |
| "M. columbarii"                        | [AJ001220] / 1997                          | 99.0% similarity search match with RIDOM entry <i>M. triplex</i> ATCC 700071 (T); probably <b>not</b> a new species                                                                                 | 16S  |
| <i>M. doricum</i>                      | [AF264700] / 2000                          | 98.4% similarity search match with GenBank entry "M. monacense" [AF107039]; <b>probably</b> a new species; this species was recently validly published [62]                                         | 16S  |
| <i>M. elephantis</i>                   | [AJ010747] / 1998                          | 99.3% similarity search match with RIDOM entry <i>M. pulveris</i> DSM 44222 (T); probably <b>not</b> a new species; this species was recently validly published [57], type strain is DSM 44368      | 16S  |
| "M. engbackii"                         | ATCC 27353 / 1972                          | 99.8% similarity search match with RIDOM entry <i>M. hiberniae</i> DSM 44241 (T); most probably <b>not</b> a new species                                                                            | 16S  |
| "M. fluoroanthenvivorans"              | DSM 44346 / 1999                           | 97.2% similarity search match with RIDOM entry <i>M. neoaurum</i> DSM 44074 (T); <b>most probably</b> a new species                                                                                 | 16S  |
| "M. gallinarum"                        | ATCC 19710 / 1967                          | 100% similarity search match with RIDOM entry <i>M. vaccae</i> DSM 43292 (T); most probably <b>not</b> a new species                                                                                | 16S  |
| "M. habana"                            | [X74056] / 1993                            | 99.6% similarity search match with GenBank entry <i>M. simiae</i> [AB026694]; probably <b>not</b> a new species                                                                                     | ITS  |
| <i>M. immunogenum</i>                  | [AJ011771] / 1998                          | 98.0% similarity search match with RIDOM entry <i>M. chelonae</i> DSM 43804 (T), <b>probably</b> a new species; this species was recently validly published [63]                                    | 16S  |
| "M. isoniacini"                        | [X80768] / 1994                            | 99.0% similarity search match with RIDOM entry <i>M. hodleri</i> DSM 44183 (T); probably <b>not</b> a new species                                                                                   | 16S  |
| <i>M. kubicae</i>                      | [AF133902] / 1999                          | 97.0% similarity search match with RIDOM entry <i>M. genavense</i> Wue Tb 0268/96; <b>most probably</b> a new species; this species was recently validly published [64], type strain is ATCC 700732 | 16S  |
| "M. lacticola"                         | DSM 43270 (ATCC 12297) / 1962              | 99.8% similarity search match with RIDOM entry <i>M. neoaurum</i> DSM 44074 (T); probably <b>not</b> a new species                                                                                  | 16S  |

|                     |                               |                                                                                                                                                                                                          |     |
|---------------------|-------------------------------|----------------------------------------------------------------------------------------------------------------------------------------------------------------------------------------------------------|-----|
| "M. lactis"         | ATCC 27356 / 1972             | 100% similarity search match with RIDOM entry <i>M. hiberniae</i> DSM 44241 (T); most probably <b>not</b> a new species                                                                                  | 16S |
| "M. lufu"           | [X74055] / 1994               | 93.9% similarity search match with GenBank entry <i>M. avium</i> complex [L07847]; <b>probably</b> a new species                                                                                         | ITS |
| "M. monacense"      | [AF107039] / 1998             | 98.4% similarity search match with GenBank entry <i>M. doricum</i> [AF264700] and 97.4% similarity search match with RIDOM entry <i>M. austro-africanum</i> DSM 44191 (T); <b>probably</b> a new species | 16S |
| "M. paraffinicum"   | DSM 44181 (ATCC 12670) / 1956 | 98.9% similarity search match with RIDOM entry <i>M. scrofulaceum</i> DSM 43992 (T); <b>probably</b> a new species                                                                                       | 16S |
| "M. petroleophilum" | DSM 44182 (ATCC 21497) / 1975 | 97.7% similarity search match with RIDOM entry <i>M. sphagni</i> ATCC 33027 (T); <b>most probably</b> a new species                                                                                      | 16S |
| "M. ratisbonense"   | [AF055331] / 1998             | 100% similarity search match with RIDOM entry <i>M. mucogenicum</i> DSM 49650 (T); most probably <b>not</b> a new species                                                                                | 16S |
| "M. runyonii"       | DSM 43282 (ATCC 14472) / 1961 | 100% similarity search match with RIDOM entries <i>M. septicum</i> DSM 44393 (T) and <i>M. peregrinum</i> ATCC 14467 (T); most probably <b>not</b> a new species                                         | 16S |
| "M. shinshuense"    | ATCC 33728 / 1982             | 99.8% similarity search match with RIDOM entries <i>M. ulcerans</i> ATCC 19423 (T) and <i>M. marinum</i> DSM 44344 (T); most probably <b>not</b> a new species                                           | 16S |
| "M. sydneyensis"    | [AF101243] / 1998             | 100% similarity search match with RIDOM entry <i>M. heckeshornense</i> Bo 7644/99; most probably <b>not</b> a new species                                                                                | 16S |
| "M. tilburgii"      | [Z50172] / 1995               | 98.4% similarity search match with RIDOM entry <i>M. simiae</i> 44165 (T); <b>probably</b> a new species                                                                                                 | 16S |
| "M. tomidae"        | DSM 43993 (ATCC 23069) / 1978 | 100% similarity search match with RIDOM entry <i>M. neoaurum</i> DSM 44074 (T); most probably <b>not</b> a new species                                                                                   | 16S |
| "M. valentiale"     | ATCC 29356 / 1978             | 100% similarity search match with RIDOM entry <i>M. duvalii</i> DSM 44244 (T); most probably <b>not</b> a new species                                                                                    | 16S |

<sup>a</sup> Culture collection reference year.

<sup>b</sup> Partial 16S rDNA sequence not identical with "M. album" ATCC 29676 and 29677 (C. Turenne, personal communication).

<sup>c</sup> GenBank submission year.

<sup>d</sup> (Culture collection number), identical strain in another culture collection.
